# Supplementary material for: Spatial analysis of PM 2.5 using a Concentration Similarity Index applied to air quality sensor networks
Source: Copernicus journal article supplement (doi:10.5194/amt-2024-38), 2024-04-04
Supplement: Supplementary file 1 [file amt-2024-38-supplement.pdf]

*Supplement of*

**Spatial analysis of PM<sub>2.5</sub> using a Concentration Similarity Index applied to air quality sensor networks**

**Byrne et al.**

## Table of Contents

|           |          |
|-----------|----------|
| Table S1  | Page S3  |
| Table S2  | Page S4  |
| Table S3  | Page S5  |
| Table S4  | Page S6  |
| Table S5  | Page S7  |
| Table S6  | Page S8  |
| Table S7  | Page S9  |
| Figure S1 | Page S10 |
| Figure S2 | Page S11 |
| Figure S3 | Page S12 |
| Figure S4 | Page S13 |
| Figure S5 | Page S14 |
| Figure S6 | Page S15 |
| Figure S7 | Page S16 |

*Table S1: Co-location periods for Clarity Node-S devices used in the Dungarvan sensor network. Grey cells indicate a device was not present for the co-location, blue cells indicate a device was present for part of the co-location period, and green cells indicate a device was present for the entire co-location period.*

| Co-location deployment period | Devices present for co-location |       |       |       |       |       |       |       |       |       |       |       |       |       |       |       |       |       |       |
|-------------------------------|---------------------------------|-------|-------|-------|-------|-------|-------|-------|-------|-------|-------|-------|-------|-------|-------|-------|-------|-------|-------|
|                               | A3                              | A4    | A8H   | A8Z   | A9    | AQ    | AZ    | A7    | A6P   | AJ3   | AP7   | AQV   | ARF   | AW6   | AWF   | AY9N  | AY93  | AYG   |       |
| 19/01/2022 – 28/01/2022       | Grey                            | Green | Green | Green | Green | Green | Green | Grey  |
| 29/10/2022 – 22/11/2022       | Grey                            | Grey  | Green | Grey  | Green | Grey  | Grey  | Grey  | Green |
| 16/06/2023 – 17/07/2023       | Green                           | Green | Green | Green | Green | Green | Green | Green | Green | Blue  | Blue  | Green | Green | Blue  | Green | Blue  | Blue  | Blue  | Blue  |

*Table S2: Linear regression results for co-located Clarity Node-S devices when compared to the mean values of all co-located data, before and after data harmonisation procedures were carried out.*

| Device ID   | Pre-harmonisation    |           |                | Post-harmonisation   |           |                |
|-------------|----------------------|-----------|----------------|----------------------|-----------|----------------|
|             | Slope                | Intercept | R <sup>2</sup> | Slope                | Intercept | R <sup>2</sup> |
|             | $\mu\text{g m}^{-3}$ |           |                | $\mu\text{g m}^{-3}$ |           |                |
| <b>A3</b>   | 1.036                | 0.933     | 0.992          | 1                    | 0         | 0.992          |
| <b>A4</b>   | 1.012                | -0.278    | 0.996          | 1                    | 0         | 0.996          |
| <b>A8H</b>  | 0.905                | 0.979     | 0.995          | 1                    | 0         | 0.995          |
| <b>A8Z</b>  | 1.003                | -0.302    | 0.997          | 1                    | 0         | 0.997          |
| <b>A9</b>   | 1.06                 | -0.535    | 0.979          | 1                    | 0         | 0.979          |
| <b>AQ</b>   | 0.989                | 0.859     | 0.997          | 1                    | 0         | 0.997          |
| <b>AZ</b>   | 0.979                | 0.079     | 0.997          | 1                    | 0         | 0.997          |
| <b>A7</b>   | 0.947                | 0.047     | 0.992          | 1                    | 0         | 0.992          |
| <b>A6P</b>  | 1.027                | 0.632     | 0.995          | 1                    | 0         | 0.995          |
| <b>AJ3</b>  | 0.989                | -0.415    | 0.993          | 1                    | 0         | 0.993          |
| <b>AP7</b>  | 0.964                | -0.477    | 0.992          | 1                    | 0         | 0.992          |
| <b>AQV</b>  | 1.042                | 0.797     | 0.997          | 1                    | 0         | 0.997          |
| <b>ARF</b>  | 1.016                | -0.276    | 0.996          | 1                    | 0         | 0.996          |
| <b>AW6</b>  | 0.958                | 0.291     | 0.984          | 1                    | 0         | 0.984          |
| <b>AWF</b>  | 0.965                | -0.554    | 0.989          | 1                    | 0         | 0.989          |
| <b>AY9N</b> | 1.065                | -0.364    | 0.988          | 1                    | 0         | 0.988          |
| <b>AY93</b> | 0.955                | 0.298     | 0.995          | 1                    | 0         | 0.995          |
| <b>AYG</b>  | 0.976                | -0.168    | 0.994          | 1                    | 0         | 0.994          |

**Table S3: Concentration Similarity Indices for hourly averaged  $PM_{2.5}$  measured by a range of co-located PurpleAir devices.**  
 $PM_{lim} = 15 \mu g m^{-3}$ ,  $C_{lim, upper} = 0.2$ ,  $C_{lim, lower} = 0.7$ .

|        | UNIT<br>2 | UNIT<br>3 | UNIT<br>4 | UNIT<br>5 |
|--------|-----------|-----------|-----------|-----------|
| UNIT 2 | 1         | 0.98      | 0.99      | 1.0       |
| UNIT 3 |           | 1         | 0.99      | 0.99      |
| UNIT 4 |           |           | 1         | 0.99      |
| UNIT 5 |           |           |           | 1         |

*Table S4: Concentration Similarity Indices for the hourly averaged PM<sub>2.5</sub> measured by Clarity Node-S devices in the Dungarvan AQS network for January 2023.*

|             | <b>A3</b> | <b>A4</b> | <b>A8H</b> | <b>A8Z</b> | <b>A9</b> | <b>AQ</b> | <b>AZ</b> | <b>A7</b> | <b>A6P</b> | <b>AJ3</b> | <b>AP7</b> | <b>AQV</b> | <b>ARF</b> | <b>AW6</b> | <b>AWF</b> | <b>AY9N</b> | <b>AY93</b> | <b>AYG</b> |   |
|-------------|-----------|-----------|------------|------------|-----------|-----------|-----------|-----------|------------|------------|------------|------------|------------|------------|------------|-------------|-------------|------------|---|
| <b>A3</b>   | 1         | 0.48      | 0.6        | 0.46       | 0.5       | 0.63      | 0.45      | 0.51      | 0.5        | 0.46       | 0.26       | 0.46       | 0.4        | 0.58       | 0.42       | 0.41        | 0.38        | 0.46       |   |
| <b>A4</b>   |           | 1         | 0.47       | 0.46       | 0.55      | 0.48      | 0.52      | 0.51      | 0.43       | 0.54       | 0.38       | 0.51       | 0.45       | 0.51       | 0.51       | 0.5         | 0.45        | 0.49       |   |
| <b>A8H</b>  |           |           | 1          | 0.49       | 0.53      | 0.54      | 0.46      | 0.56      | 0.49       | 0.53       | 0.37       | 0.55       | 0.44       | 0.59       | 0.47       | 0.57        | 0.41        | 0.5        |   |
| <b>A8Z</b>  |           |           |            | 1          | 0.58      | 0.42      | 0.62      | 0.46      | 0.49       | 0.57       | 0.57       | 0.57       | 0.52       | 0.52       | 0.55       | 0.61        | 0.49        | 0.6        |   |
| <b>A9</b>   |           |           |            |            | 1         | 0.48      | 0.57      | 0.53      | 0.46       | 0.54       | 0.47       | 0.56       | 0.45       | 0.54       | 0.5        | 0.51        | 0.44        | 0.56       |   |
| <b>AQ</b>   |           |           |            |            |           | 1         | 0.43      | 0.5       | 0.47       | 0.45       | 0.26       | 0.45       | 0.39       | 0.56       | 0.37       | 0.45        | 0.35        | 0.42       |   |
| <b>AZ</b>   |           |           |            |            |           |           | 1         | 0.52      | 0.52       | 0.61       | 0.52       | 0.61       | 0.51       | 0.53       | 0.56       | 0.53        | 0.44        | 0.67       |   |
| <b>A7</b>   |           |           |            |            |           |           |           | 1         | 0.46       | 0.51       | 0.34       | 0.53       | 0.41       | 0.56       | 0.47       | 0.46        | 0.37        | 0.48       |   |
| <b>A6P</b>  |           |           |            |            |           |           |           |           | 1          | 0.61       | 0.42       | 0.5        | 0.49       | 0.57       | 0.55       | 0.51        | 0.49        | 0.61       |   |
| <b>AJ3</b>  |           |           |            |            |           |           |           |           |            | 1          | 0.49       | 0.67       | 0.54       | 0.59       | 0.72       | 0.53        | 0.63        | 0.71       |   |
| <b>AP7</b>  |           |           |            |            |           |           |           |           |            |            | 1          | 0.45       | 0.5        | 0.37       | 0.49       | 0.51        | 0.44        | 0.54       |   |
| <b>AQV</b>  |           |           |            |            |           |           |           |           |            |            |            | 1          | 0.5        | 0.58       | 0.63       | 0.55        | 0.52        | 0.66       |   |
| <b>ARF</b>  |           |           |            |            |           |           |           |           |            |            |            |            | 1          | 0.52       | 0.54       | 0.59        | 0.46        | 0.58       |   |
| <b>AW6</b>  |           |           |            |            |           |           |           |           |            |            |            |            |            | 1          | 0.54       | 0.59        | 0.49        | 0.58       |   |
| <b>AWF</b>  |           |           |            |            |           |           |           |           |            |            |            |            |            |            | 1          | 0.49        | 0.64        | 0.73       |   |
| <b>AY9N</b> |           |           |            |            |           |           |           |           |            |            |            |            |            |            |            | 1           | 0.5         | 0.54       |   |
| <b>AY93</b> |           |           |            |            |           |           |           |           |            |            |            |            |            |            |            |             | 1           | 0.63       |   |
| <b>AYG</b>  |           |           |            |            |           |           |           |           |            |            |            |            |            |            |            |             |             |            | 1 |

*Table S5: Concentration Similarity Indices for the hourly averaged PM<sub>2.5</sub> measured by Clarity Node-S devices in the Dungarvan AQS network for May 2023.*

|             | <b>A3</b> | <b>A4</b> | <b>A8H</b> | <b>A8Z</b> | <b>A9</b> | <b>AQ</b> | <b>AZ</b> | <b>A7</b> | <b>A6P</b> | <b>AJ3</b> | <b>AP7</b> | <b>AQV</b> | <b>ARF</b> | <b>AW6</b> | <b>AWF</b> | <b>AY9N</b> | <b>AY93</b> | <b>AYG</b> |
|-------------|-----------|-----------|------------|------------|-----------|-----------|-----------|-----------|------------|------------|------------|------------|------------|------------|------------|-------------|-------------|------------|
| <b>A3</b>   | 1         | 0.85      | 0.9        | 0.83       | 0.84      | 0.89      | 0.87      | 0.88      | 0.9        | 0.88       | 0.8        | 0.9        | 0.81       | 0.88       | 0.82       | 0.81        | 0.86        | 0.86       |
| <b>A4</b>   |           | 1         | 0.84       | 0.82       | 0.87      | 0.8       | 0.82      | 0.89      | 0.82       | 0.87       | 0.81       | 0.85       | 0.75       | 0.81       | 0.81       | 0.79        | 0.79        | 0.81       |
| <b>A8H</b>  |           |           | 1          | 0.83       | 0.84      | 0.86      | 0.83      | 0.87      | 0.88       | 0.86       | 0.79       | 0.86       | 0.75       | 0.82       | 0.79       | 0.8         | 0.85        | 0.83       |
| <b>A8Z</b>  |           |           |            | 1          | 0.87      | 0.84      | 0.91      | 0.85      | 0.85       | 0.87       | 0.89       | 0.88       | 0.78       | 0.76       | 0.82       | 0.82        | 0.82        | 0.9        |
| <b>A9</b>   |           |           |            |            | 1         | 0.79      | 0.86      | 0.89      | 0.84       | 0.91       | 0.85       | 0.88       | 0.78       | 0.81       | 0.89       | 0.85        | 0.78        | 0.84       |
| <b>AQ</b>   |           |           |            |            |           | 1         | 0.82      | 0.83      | 0.84       | 0.83       | 0.76       | 0.87       | 0.74       | 0.8        | 0.73       | 0.77        | 0.83        | 0.84       |
| <b>AZ</b>   |           |           |            |            |           |           | 1         | 0.82      | 0.88       | 0.9        | 0.83       | 0.93       | 0.84       | 0.84       | 0.86       | 0.8         | 0.81        | 0.94       |
| <b>A7</b>   |           |           |            |            |           |           |           | 1         | 0.86       | 0.88       | 0.83       | 0.86       | 0.77       | 0.86       | 0.82       | 0.8         | 0.82        | 0.82       |
| <b>A6P</b>  |           |           |            |            |           |           |           |           | 1          | 0.92       | 0.84       | 0.93       | 0.84       | 0.9        | 0.9        | 0.87        | 0.86        | 0.93       |
| <b>AJ3</b>  |           |           |            |            |           |           |           |           |            | 1          | 0.86       | 0.93       | 0.85       | 0.89       | 0.94       | 0.91        | 0.84        | 0.94       |
| <b>AP7</b>  |           |           |            |            |           |           |           |           |            |            | 1          | 0.82       | 0.81       | 0.72       | 0.87       | 0.79        | 0.8         | 0.82       |
| <b>AQV</b>  |           |           |            |            |           |           |           |           |            |            |            | 1          | 0.84       | 0.89       | 0.9        | 0.86        | 0.84        | 0.94       |
| <b>ARF</b>  |           |           |            |            |           |           |           |           |            |            |            |            | 1          | 0.77       | 0.84       | 0.72        | 0.76        | 0.87       |
| <b>AW6</b>  |           |           |            |            |           |           |           |           |            |            |            |            |            | 1          | 0.83       | 0.76        | 0.81        | 0.84       |
| <b>AWF</b>  |           |           |            |            |           |           |           |           |            |            |            |            |            |            | 1          | 0.91        | 0.76        | 0.92       |
| <b>AY9N</b> |           |           |            |            |           |           |           |           |            |            |            |            |            |            |            | 1           | 0.77        | 0.88       |
| <b>AY93</b> |           |           |            |            |           |           |           |           |            |            |            |            |            |            |            |             | 1           | 0.83       |
| <b>AYG</b>  |           |           |            |            |           |           |           |           |            |            |            |            |            |            |            |             |             | 1          |

**Table S6: Concentration Similarity Indices for hourly averaged PM<sub>2.5</sub> measured by PurpleAir devices in the Cork City AQS network for January 2021.**

|       | CCC1 | CCC2 | CCC3 | CCC4 | CCC5 | CCC7 | CCC8 | CCC9 | CCC11 | CCC12 | MTU  | UCC  |
|-------|------|------|------|------|------|------|------|------|-------|-------|------|------|
| CCC1  | 1    | 0.55 | 0.63 | 0.52 | 0.72 | 0.61 | 0.6  | 0.42 | 0.7   | 0.54  | 0.55 | 0.59 |
| CCC2  |      | 1    | 0.54 | 0.58 | 0.63 | 0.48 | 0.59 | 0.56 | 0.69  | 0.6   | 0.4  | 0.59 |
| CCC3  |      |      | 1    | 0.48 | 0.58 | 0.67 | 0.65 | 0.35 | 0.67  | 0.49  | 0.63 | 0.56 |
| CCC4  |      |      |      | 1    | 0.59 | 0.45 | 0.51 | 0.54 | 0.6   | 0.58  | 0.42 | 0.5  |
| CCC5  |      |      |      |      | 1    | 0.54 | 0.62 | 0.65 | 0.7   | 0.6   | 0.4  | 0.66 |
| CCC7  |      |      |      |      |      | 1    | 0.54 | 0.33 | 0.59  | 0.42  | 0.6  | 0.46 |
| CCC8  |      |      |      |      |      |      | 1    | 0.65 | 0.66  | 0.57  | 0.4  | 0.75 |
| CCC9  |      |      |      |      |      |      |      | 1    | 0.5   | 0.57  | 0.18 | 0.7  |
| CCC11 |      |      |      |      |      |      |      |      | 1     | 0.59  | 0.46 | 0.65 |
| CCC12 |      |      |      |      |      |      |      |      |       | 1     | 0.33 | 0.55 |
| MTU   |      |      |      |      |      |      |      |      |       |       | 1    | 0.31 |
| UCC   |      |      |      |      |      |      |      |      |       |       |      | 1    |



**Table S7: Concentration Similarity Indices for hourly averaged PM<sub>2.5</sub> measured by PurpleAir devices in the Cork City AQS network for May 2021.**

|       | CCC1 | CCC2 | CCC3 | CCC4 | CCC5 | CCC7 | CCC8 | CCC9 | CCC11 | CCC12 | MTU  | UCC  |
|-------|------|------|------|------|------|------|------|------|-------|-------|------|------|
| CCC1  | 1    | 0.58 | 0.7  | 0.51 | 0.63 | 0.63 | 0.58 | 0.45 | 0.5   | 0.39  | 0.74 | 0.58 |
| CCC2  |      | 1    | 0.91 | 0.94 | 0.93 | 0.92 | 0.94 | 0.89 | 0.95  | 0.91  | 0.81 | 0.95 |
| CCC3  |      |      | 1    | 0.85 | 0.93 | 0.95 | 0.92 | 0.84 | 0.88  | 0.79  | 0.9  | 0.92 |
| CCC4  |      |      |      | 1    | 0.91 | 0.86 | 0.9  | 0.94 | 0.93  | 0.91  | 0.74 | 0.92 |
| CCC5  |      |      |      |      | 1    | 0.92 | 0.9  | 0.83 | 0.94  | 0.83  | 0.86 | 0.96 |
| CCC7  |      |      |      |      |      | 1    | 0.93 | 0.86 | 0.9   | 0.8   | 0.86 | 0.91 |
| CCC8  |      |      |      |      |      |      | 1    | 0.89 | 0.92  | 0.84  | 0.79 | 0.9  |
| CCC9  |      |      |      |      |      |      |      | 1    | 0.92  | 0.91  | 0.63 | 0.91 |
| CCC11 |      |      |      |      |      |      |      |      | 1     | 0.91  | 0.75 | 0.96 |
| CCC12 |      |      |      |      |      |      |      |      |       | 1     | 0.6  | 0.87 |
| MTU   |      |      |      |      |      |      |      |      |       |       | 1    | 0.79 |
| UCC   |      |      |      |      |      |      |      |      |       |       |      | 1    |

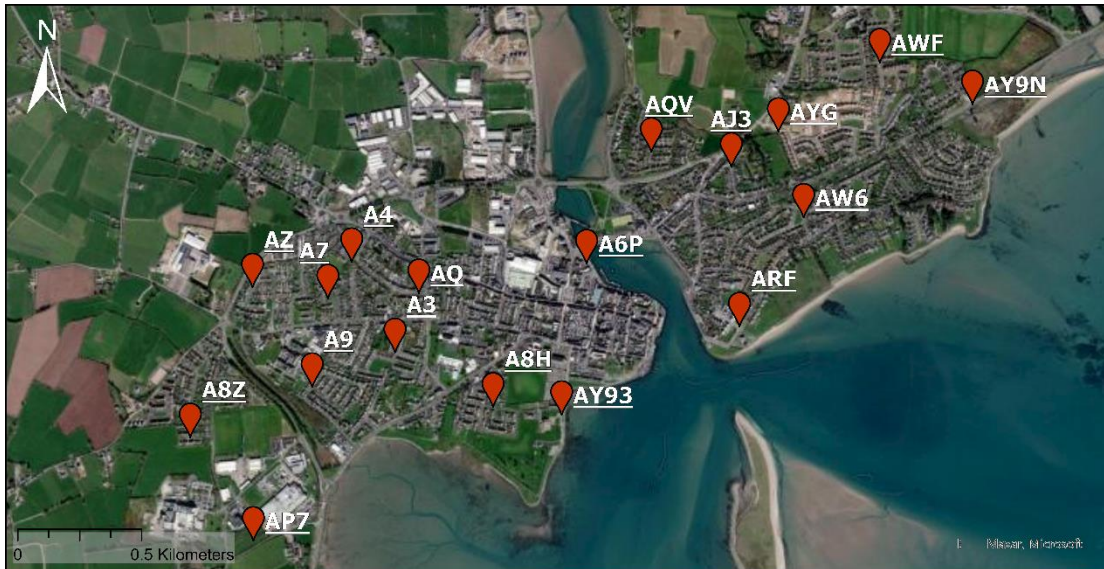

*Figure S1: Map of Dungarvan with Clarity Node-S sensor locations and labels. (Map obtained from Esri, DigitalGlobe, GeoEye, i-cubed, USDA FSA, USGS, AEX, Getmapping, Aerogrid, IGN, IGP, swisstopo, and the GIS User Community)*

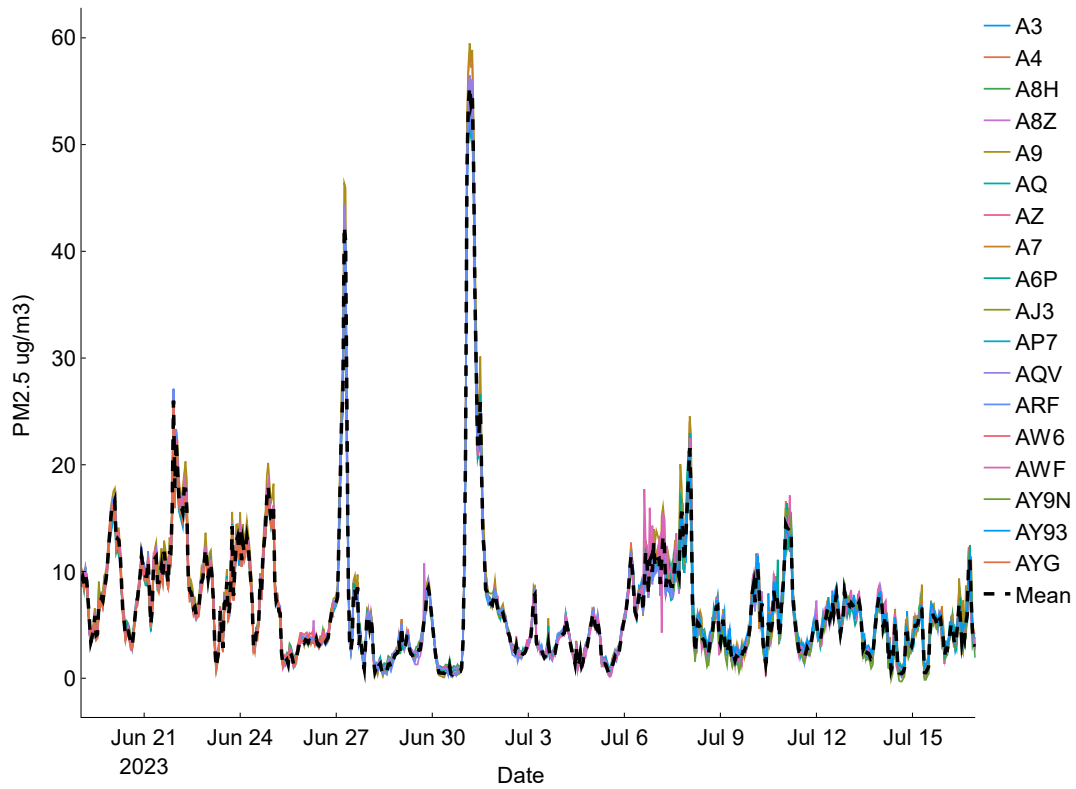

**Figure S2: Hourly averaged PM<sub>2.5</sub> from co-located and harmonised Clarity Node-S devices including the mean PM<sub>2.5</sub> data series used for the harmonisation (19 June 2023–18 July 2023).**

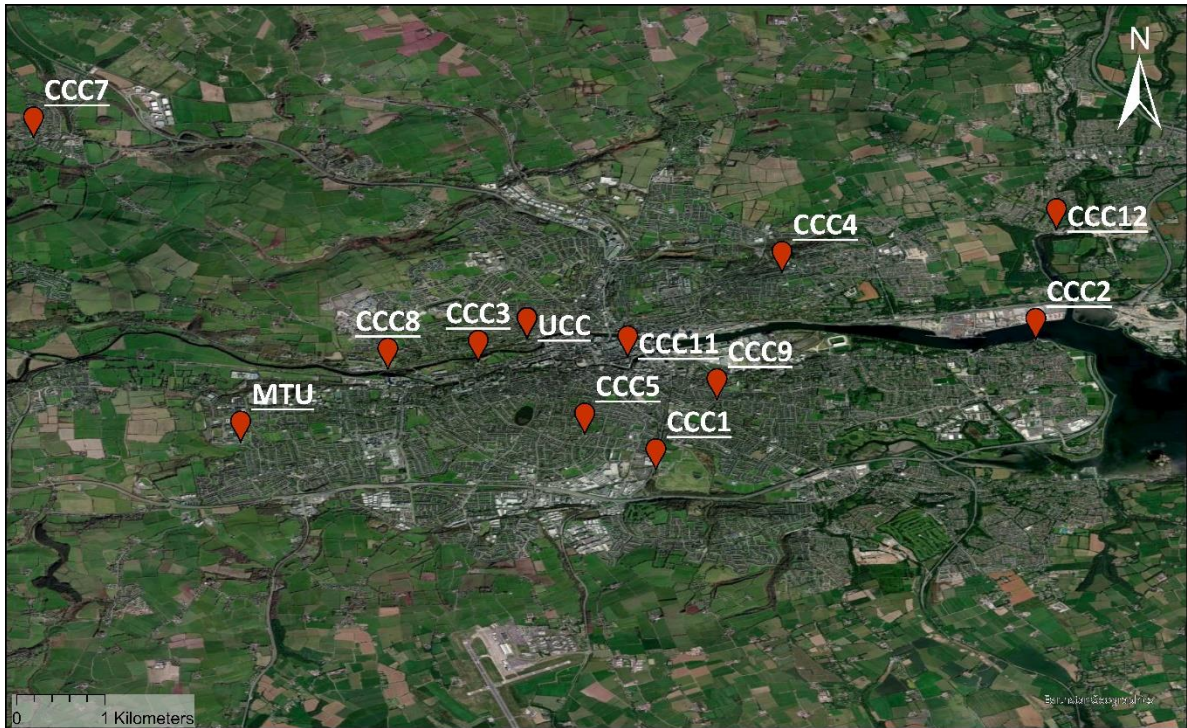

*Figure S3: Map of Cork city with PurpleAir PA-II-SD sensor locations and labels. (Map obtained from Esri, DigitalGlobe, GeoEye, i-cubed, USDA FSA, USGS, AEX, Getmapping, Aerogrid, IGN, IGP, swisstopo, and the GIS User Community)*

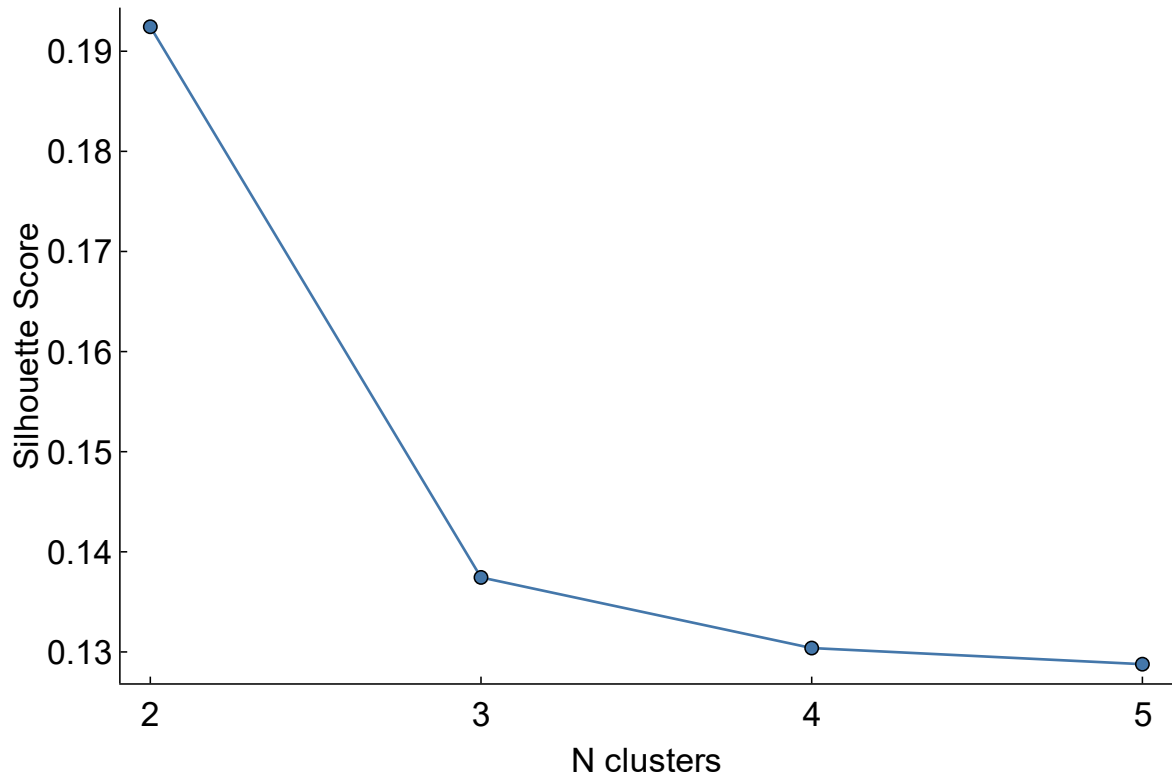

*Figure S4: Silhouette scores for Hierarchical clustering on the Dungarvan sensor network CSI results.*

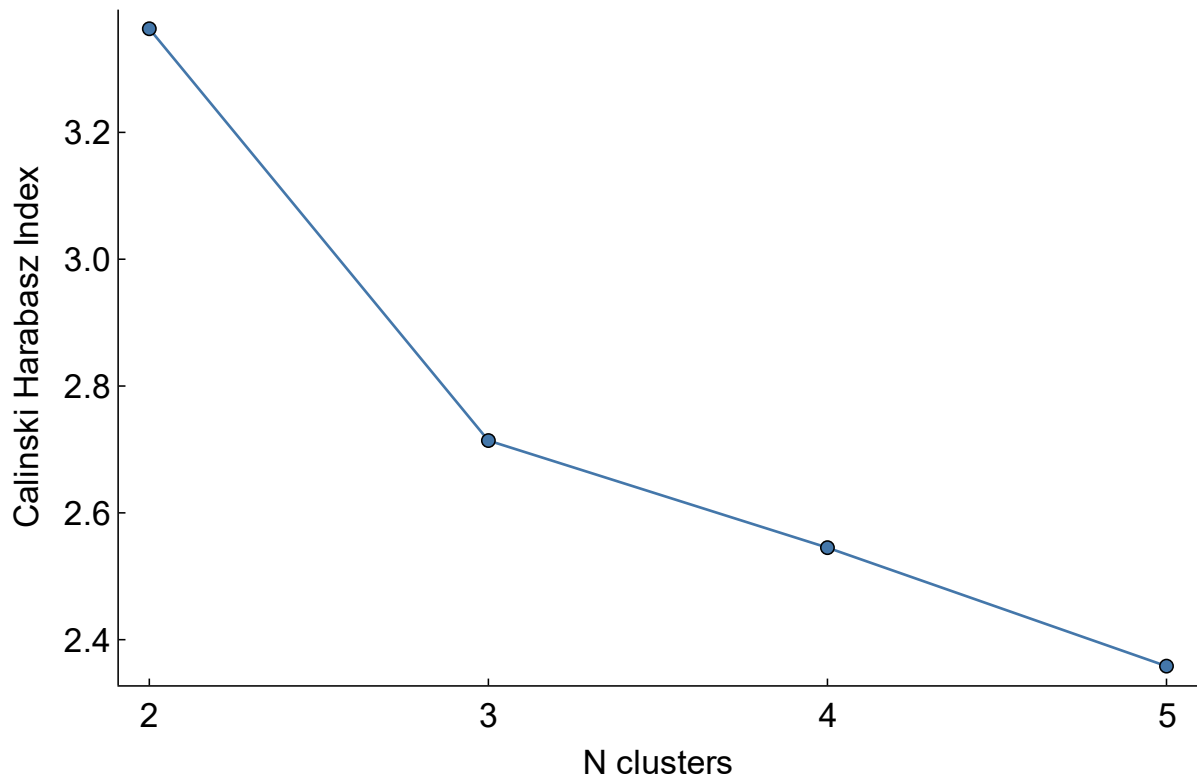

*Figure S5: Calinski-Harabasz Indices for FCM clustering on the Dungarvan sensor network CSI results.*

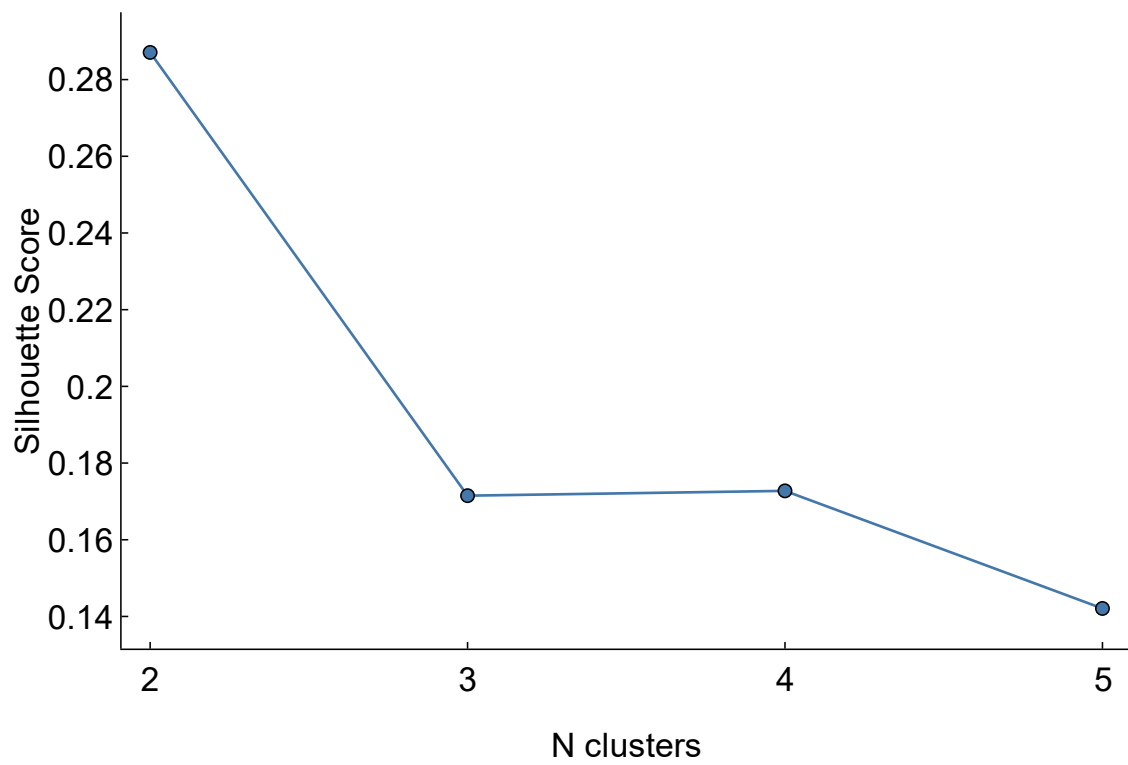

*Figure S6: Silhouette scores for Hierarchical clustering on the Cork sensor network CSI results.*

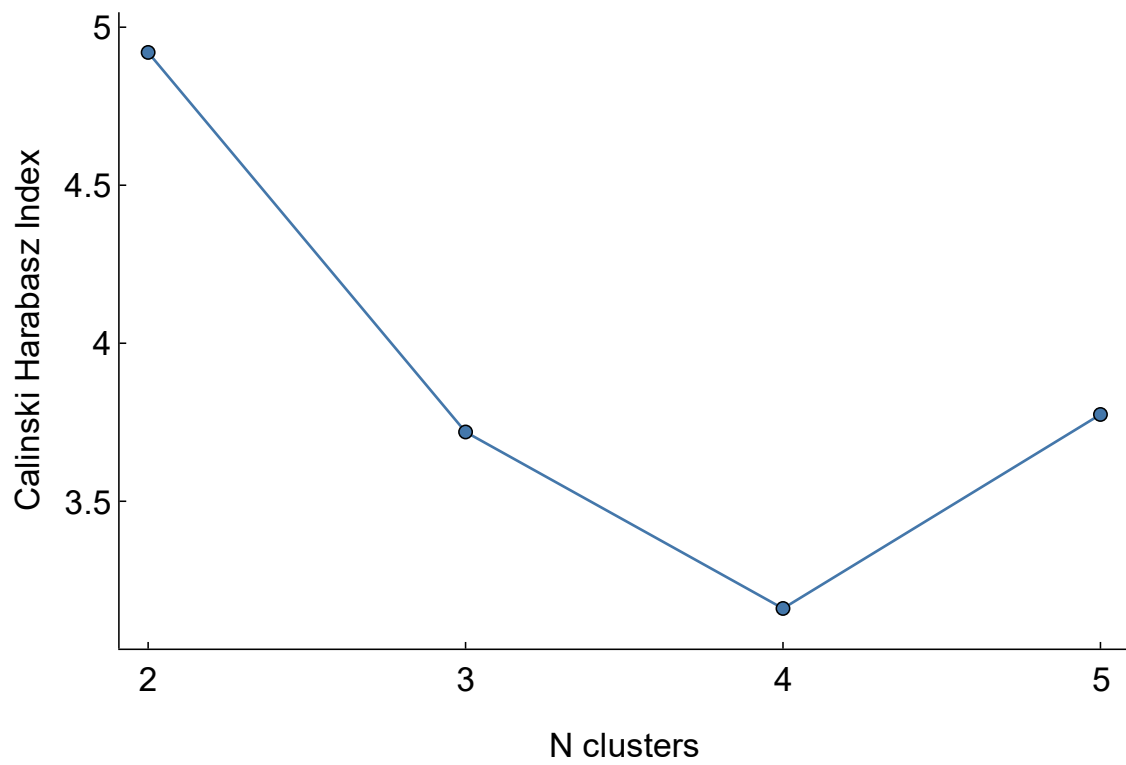

*Figure S7: Calinski-Harabasz Indices for FCM clustering on the Cork sensor network CSI results.*
